# Supplementary material
Source: HighWire-hosted journal article supplement (https://cmaj.ca/highwire/filestream/151090/field_highwire_adjunct_files/3/231547-res-4-at.pdf)

Online Appendix 4, Figure S2. Rate of any hypertensive disorders of pregnancy (HDP) by maternal age groups in Canada (excluding Quebec), 2012 and 2021

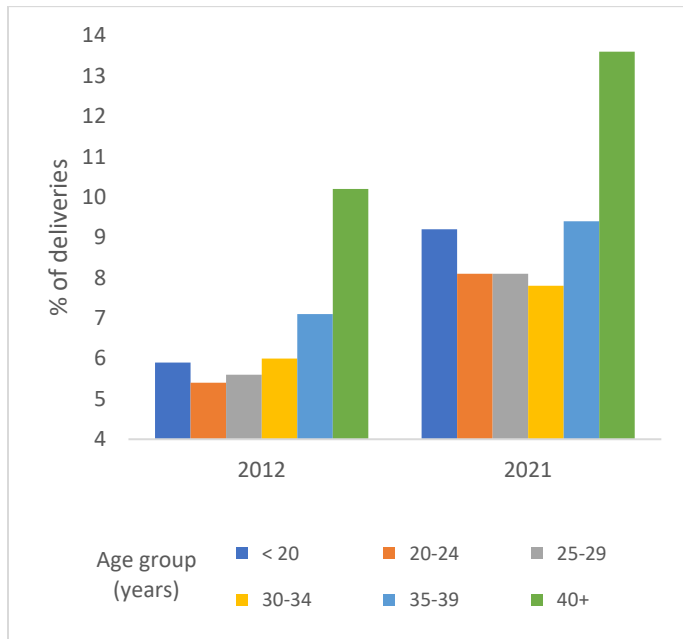

Supplement: 231547-res-4-at.pdf [file 231547-res-4-at.pdf]
